# Supplementary material for: Second-Trimester Constituents of the Metabolic Syndrome and Pregnancy Outcome: An Observational Cohort Study
Source: MDPI journal article supplement (doi:10.3390/nu14142933), 2022-07-18
Supplement: s1 [file s1]

| I. PE (n= 97 (4.8%))   |     |                       | GDM                  |                        | OR                   | aOR                    |
|------------------------|-----|-----------------------|----------------------|------------------------|----------------------|------------------------|
|                        |     |                       | -                    | +                      |                      |                        |
|                        |     | Total                 | 67/1465 (4.6%)       | 30/576 (5.2%)          | 1.15 (CI 0.74-1.78)  | 1.18 (CI 0.70-1.97)    |
| Hypertension           | -   | 50/1682 (3.0%)        | 33/1216 (2.7%)       | 17/466 (3.6%)          | 1.36 (CI 0.75-2.46)  | 1.27 (CI 0.67-2.41)    |
|                        | +   | 47/358 (13.1%)        | 34/249 (13.7%)       | 13/109 (11.9%)         | 0.86 (CI 0.43-1.70)  | 1.20 (CI 0.49-2.93)    |
|                        | OR  | 4.93 (CI 3.25-7.48)   | 5.67 (CI 3.44-9.35)  | 3.58 (CI 1.68-7.61)    |                      |                        |
|                        | aOR | 3.14 (CI 1.94-5.10)   | 3.61 (CI 2.04-6.40)  | 2.02 (CI 0.79-5.20)    |                      |                        |
|                        |     |                       |                      |                        |                      |                        |
| Obesity                | -   | 69/1416 (4.9%)        | 54/1103 (4.9%)       | 15/313 (4.8%)          | 0.98 (CI 0.54-1.76)  | 0.96 (CI 0.49-1.89)    |
|                        | +   | 28/618 (4.5%)         | 13/358 (3.6%)        | 15/260 (5.8%)          | 1.63 (CI 0.76-3.48)  | 1.92 (CI 0.80-4.61)    |
|                        | OR  | 0.93 (CI 0.59-1.45)   | 0.73 (CI 0.40-1.36)  | 1.22 (CI 0.58-2.54)    |                      |                        |
|                        | aOR | 0.79 (CI 0.47-1.31)   | 0.60 (CI 0.28-1.18)  | 1.43 (CI 0.58-3.52)    |                      |                        |
|                        |     |                       |                      |                        |                      |                        |
| Dyslipidemia           | -   | 84/1923 (4.4%)        | 59/1397 (4.2%)       | 25/526 (4.8%)          | 1.13 (CI 0.70-1.83)  | 1.29 (CI 0.75-2.22)    |
|                        | +   | 12/117 (10.3%)        | 7/67 (10.4%)         | 5/50 (10.0%)           | 0.95 (CI 0.28-3.20)  | 0.64 (CI 0.13-3.21)    |
|                        | OR  | 2.50 (CI 1.33-4.73)   | 2.65 (CI 1.16-6.04)  | 2.23 (CI 0.81-6.10)    |                      |                        |
|                        | aOR | 2.25 (CI 1.09-4.73)   | 3.07 (CI 1.26-7.50)  | 1.05 (CI 0.25-4.50)    |                      |                        |
|                        |     |                       |                      |                        |                      |                        |
| Proteinuria            | -   | 86/1968 (4.4%)        | 62/1419 (4.4%)       | 24/549 (4.4%)          | 1.00 (CI 0.62-1.62)  | 1.04 (CI 0.60-1.79)    |
|                        | +   | 10/26 (38.5%)         | 4/15 (26.7%)         | 6/11 (54.5%)           | 3.30 (CI 0.64-17.16) | 11.69 (CI 0.61-225.96) |
|                        | OR  | 13.68 (CI 6.03-31.03) | 7.96 (CI 2.46-25.70) | 26.25 (CI 7.48-92.11)  |                      |                        |
|                        | aOR | 12.64 (CI 4.37-36.54) | 4.33 (CI 0.96-19.63) | 56.85 (CI 9.02-358.46) |                      |                        |
|                        |     |                       |                      |                        |                      |                        |
| ≥ 2 constituents       | -   | 73/1794 (4.1%)        | 54/1326 (4.1%)       | 19/468 (4.1%)          | 1.00 (CI 0.59-1.70)  | -                      |
|                        | +   | 22/191 (11.5%)        | 11/103 (10.7%)       | 11/88 (12.5%)          | 1.20 (CI 0.49-2.91)  | -                      |
| OR                     |     | 3.07 (CI 1.86-5.07)   | 2.82 (CI 1.42-5.57)  | 3.38 (CI 1.55-7.37)    |                      |                        |
| II. <37 (n=169 (8.3%)) |     | Total                 | 113/1465 (7.7%)      | 56/576 (9.7%)          | 1.29 (CI 0.92-1.80)  | 1.45 (CI 0.99-2.12)    |
| Hypertension           | -   | 115/1682 (6.8%)       | 77/1216 (6.3%)       | 38/466 (8.2%)          | 1.31 (CI 0.88-1.97)  | 1.35 (CI 0.87-2.12)    |
|                        | +   | 54/358 (15.1%)        | 36/249 (14.5%)       | 18/109 (16.5%)         | 1.17 (CI 0.63-2.17)  | 1.91 (CI 0.90-4.08)    |
|                        | OR  | 2.42 (CI 1.71-3.42)   | 2.50 (CI 1.64-3.81)  | 2.23 (CI 1.22-4.08)    |                      |                        |
|                        | aOR | 2.17 (CI 1.46-3.23)   | 2.13 (CI 1.31-3.47)  | 2.23 (CI 1.12-4.48)    |                      |                        |
|                        |     |                       |                      |                        |                      |                        |
| Obesity                | -   | 118/1416 (8.3%)       | 88/1103 (8.0%)       | 30/313 (9.6%)          | 1.22 (CI 0.79-1.89)  | 1.66 (CI 1.03-2.67)    |
|                        | +   | 50/618 (8.1%)         | 24/358 (6.7%)        | 26/260 (10.0%)         | 1.55 (CI 0.87-2.76)  | 1.27 (CI 0.68-2.38)    |
|                        | OR  | 0.97 (CI 0.69-1.37)   | 0.83 (CI 0.52-1.32)  | 1.05 (CI 0.60-1.82)    |                      |                        |
|                        | aOR | 0.99 (CI 0.68-1.44)   | 0.97 (CI 0.59-1.59)  | 0.81 (CI 0.42-1.54)    |                      |                        |
|                        |     |                       |                      |                        |                      |                        |
| Dyslipidemia           | -   | 152/1923 (7.9%)       | 105/1397 (7.5%)      | 47/526 (8.9%)          | 1.21 (CI 0.84-1.73)  | 1.44 (CI 0.96-2.14)    |
|                        | +   | 17/117 (14.5%)        | 8/67 (11.9%)         | 9/50 (18.0%)           | 1.62 (CI 0.58-4.55)  | 1.94 (CI 0.49-7.58)    |
|                        | OR  | 1.98 (CI 1.15-3.40)   | 1.67 (CI 0.78-3.59)  | 2.24 (CI 1.02-4.89)    |                      |                        |
|                        | aOR | 1.69 (CI 0.92-3.11)   | 1.61 (CI 0.70-3.67)  | 1.61 (CI 0.62-4.20)    |                      |                        |
|                        |     |                       |                      |                        |                      |                        |
| Proteinuria            | -   | 154/1968 (7.8%)       | 104/1419 (7.3%)      | 50/549 (9.1%)          | 1.27 (CI 0.89-1.80)  | 1.39 (CI 0.94-2.04)    |
|                        | +   | 10/26 (38.5%)         | 5/15 (33.3%)         | 5/11 (45.5%)           | 1.67 (CI 0.34-8.26)  | 5.11 (CI 0.24-108.70)  |
|                        | OR  | 7.36 (CI 3.29-16.50)  | 6.32 (CI 2.12-18.84) | 8.32 (CI 2.45-28.22)   |                      |                        |
|                        | aOR | 4.72 (CI 1.67-13.35)  | 2.10 (CI 0.43-10.20) | 14.41 (CI 2.57-80.78)  |                      |                        |
|                        |     |                       |                      |                        |                      |                        |
| ≥ 2 constituents       | -   | 136/1794 (7.6%)       | 96/1326 (7.2%)       | 40/468 (8.5%)          | 1.20 (CI 0.82-1.76)  | -                      |
|                        | +   | 27/191 (19.4%)        | 12/103 (11.7%)       | 15/88 (17.0%)          | 1.56 (CI 0.69-3.54)  | -                      |
|                        | OR  | 2.01 (CI 1.29-3.13)   | 1.69 (CI 0.89-3.19)  | 2.20 (CI 1.16-4.18)    |                      |                        |
| III. <34 (n=55 (2.7%)) |     |                       | GDM                  |                        | OR                   | aOR                    |
|                        |     |                       | -                    | +                      |                      |                        |
|                        |     | Total                 | 39/1465 (2.7%)       | 16/576 (2.8%)          | 1.05 (CI 0.58-1.89)  | 1.23 (CI 0.64-2.34)    |

|                         |   |                             |                              |                             |                     |                      |
|-------------------------|---|-----------------------------|------------------------------|-----------------------------|---------------------|----------------------|
| <b>Hypertension</b>     | - | 33/1682 (2.0%)              | 25/1216 (2.1%)               | 8/466 (1.7%)                | 0.83 (CI 0.37-1.86) | 0.99 (CI 0.43-2.29)  |
|                         | + | 22/358 (6.1%)               | 14/249 (5.6%)                | 8/109 (7.3%)                | 1.33 (CI 0.54-3.27) | 1.74 (CI 0.56-5.47)  |
| OR                      |   | <b>3.27 (CI 1.88-5.68)</b>  | <b>2.84 (CI 1.45-5.54)</b>   | <b>4.54 (CI 1.66-12.37)</b> |                     |                      |
| aOR                     |   | <b>2.96 (CI 1.59-5.53)</b>  | <b>2.50 (CI 1.14-5.46)</b>   | <b>4.05 (CI 1.35-12.19)</b> |                     |                      |
|                         |   |                             |                              |                             |                     |                      |
| <b>Obesity</b>          | - | 39/1416 (2.8%)              | 31/1103 (2.8%)               | 8/313 (2.6%)                | 0.91 (CI 0.41-1.99) | 1.22 (CI 0.53-2.83)  |
|                         | + | 16/618 (2.6%)               | 8/358 (2.2%)                 | 8/260 (3.1%)                | 1.39 (CI 0.51-3.75) | 1.30 (CI 0.46-3.67)  |
| OR                      |   | 0.94 (CI 0.52-1.69)         | 0.79 (CI 0.36-1.74)          | 1.21 (CI 0.45-3.27)         |                     |                      |
| aOR                     |   | 1.02 (CI 0.55-1.91)         | 0.98 (CI 0.43-2.24)          | 0.85 (CI 0.28-2.55)         |                     |                      |
|                         |   |                             |                              |                             |                     |                      |
| <b>Dyslipidemia</b>     | - | 49/1923 (2.5%)              | 36/1397 (2.6%)               | 13/526 (2.5%)               | 0.96 (CI 0.50-1.82) | 1.21 (CI 0.61-2.40)  |
|                         | + | 6/117 (5.1%)                | 3/67 (4.5%)                  | 3/50 (6.0%)                 | 1.36 (CI 0.26-7.05) | 1.36 (CI 0.09-20.47) |
| OR                      |   | 2.07 (CI 0.87-4.93)         | 1.77 (CI 0.53-5.91)          | 2.52 (CI 0.69-9.15)         |                     |                      |
| aOR                     |   | 1.90 (CI 0.76-4.76)         | 1.86 (0.54-6.42)             | 1.71 (CI 0.39-7.43)         |                     |                      |
|                         |   |                             |                              |                             |                     |                      |
| <b>Proteinuria</b>      | - | 48/1968 (2.4%)              | 33/1419 (2.3%)               | 15/549 (2.7%)               | 1.18 (CI 0.64-2.19) | 1.24 (CI 0.64-2.40)  |
|                         | + | 5/26 (19.2%)                | 4/15 (26.7%)                 | 1/11 (9.1%)                 | 0.28 (CI 0.03-2.89) | NA                   |
| OR                      |   | <b>9.52 (CI 3.45-26.32)</b> | <b>15.27 (CI 4.62-50.47)</b> | 3.56 (CI 0.43-29.62)        |                     |                      |
| aOR                     |   | <b>5.16 (CI 1.33-20.08)</b> | <b>6.12 (CI 1.19-31.38)</b>  | 3.62 (CI 0.29-45.45)        |                     |                      |
|                         |   |                             |                              |                             |                     |                      |
| <b>≥ 2 constituents</b> | - | 40/1794 (2.2%)              | 30/1326 (2.3%)               | 10/468 (2.1%)               | 0.94 (CI 0.46-1.95) | -                    |
|                         | + | 13/191 (6.8%)               | 7/103 (6.8%)                 | 6/88 (6.8%)                 | 1.00 (CI 0.32-3.11) | -                    |
| OR                      |   | <b>3.20 (CI 1.68-6.10)</b>  | <b>3.15 (CI 1.35-7.36)</b>   | <b>3.35 (CI 1.19-9.47)</b>  |                     |                      |

**Table S2.** Odds ratios for the development of PE and delivery <37 weeks and <34 weeks. In vertical direction, ORs are calculated to explore the effect of the constituents for the group as a whole and sub-grouped without and with GDM. Along the horizontal axis, ORs are also detailed to explore an effect of GDM. Adjustments were made for the other constituents of the metabolic syndrome, age, Northern European ethnicity and gestational age at time of OGTT.
