# Supplementary material for: Second-Trimester Constituents of the Metabolic Syndrome and Pregnancy Outcome: An Observational Cohort Study
Source: MDPI journal article supplement (doi:10.3390/nu14142933), 2022-07-18
Supplement: s1 [file s1]

| I. LGA (n= 210<br>(10.3%)) |   |                     | GDM                 |                      | OR                   | aOR                  |
|----------------------------|---|---------------------|---------------------|----------------------|----------------------|----------------------|
|                            |   |                     | -                   | +                    |                      |                      |
|                            |   | Total               | 148/1465 (10.1%)    | 62/575 (10.8%)       | 1.08 (CI 0.79-1.47)  | 1.02 (0.72-1.45)     |
| Hypertension               | - | 188/1681 (11.2%)    | 133/1216 (10.9%)    | 55/465 (11.8%)       | 1.09 (CI 0.78-1.53)  | 1.11 (CI 0.77-1.60)  |
|                            | + | 21/358 (5.9%)       | 15/249 (6.0%)       | 6/109 (5.5%)         | 0.91 (CI 0.34-2.41)  | 0.40 (CI 0.11-1.41)  |
| OR                         |   | 0.50 (CI 0.31-0.79) | 0.52 (CI 0.30-0.91) | 0.43 (CI 0.18-1.04)  |                      |                      |
| aOR                        |   | 0.46 (CI 0.28-0.77) | 0.54 (CI 0.31-0.97) | 0.30 (CI 0.11-0.87)  |                      |                      |
|                            |   |                     |                     |                      |                      |                      |
| Obesity                    | - | 139/1415 (9.8%)     | 106/1103 (9.6%)     | 33/312 (10.6%)       | 1.11 (CI 0.74-1.68)  | 1.21 (CI 0.78-1.89)  |
|                            | + | 71/618 (11.5%)      | 42/358 (11.7%)      | 29/260 (11.2%)       | 0.95 (CI 0.57-1.56)  | 0.75 (CI 0.43-1.33)  |
| OR                         |   | 1.19 (CI 0.88-1.61) | 1.25 (CI 0.86-1.83) | 1.06 (CI 0.63-1.80)  |                      |                      |
| aOR                        |   | 1.17 (CI 0.84-1.63) | 1.25 (CI 0.83-1.88) | 1.05 (CI 0.58-1.92)  |                      |                      |
|                            |   |                     |                     |                      |                      |                      |
| Dyslipidemia               | - | 195/1922 (10.1%)    | 139/1397 (9.9%)     | 56/525 (10.7%)       | 1.08 (CI 0.78-1.50)  | 1.08 (CI 0.75-1.55)  |
|                            | + | 15/117 (12.8%)      | 9/67 (13.4%)        | 6/50 (12.0%)         | 0.88 (CI 0.29-2.65)  | 0.41 (CI 0.09-1.87)  |
| OR                         |   | 1.30 (CI 0.74-2.28) | 1.40 (CI 0.68-2.90) | 1.14 (CI 0.47-2.80)  |                      |                      |
| aOR                        |   | 1.15 (CI 0.61-2.16) | 1.44 (CI 0.69-3.01) | 0.70 (CI 0.20-2.41)  |                      |                      |
|                            |   |                     |                     |                      |                      |                      |
| Proteinuria                | - | 205/1967 (10.4%)    | 144/1419 (10.1%)    | 61/548 (11.1%)       | 1.11 (CI 0.81-1.52)  | 1.02 (CI 0.72-1.45)  |
|                            | + | 1/26 (3.8%)         | 0/15 (0.0%)         | 1/11 (9.1%)          | NA                   | NA                   |
| OR                         |   | 0.34 (CI 0.05-2.55) | NA                  | 0.80 (CI 0.10-6.35)  |                      |                      |
| aOR                        |   | NA                  | NA                  | NA                   |                      |                      |
|                            |   |                     |                     |                      |                      |                      |
| ≥ 2 constituents           | - | 187/1793 (10.4%)    | 135/1326 (10.2%)    | 52/467 (11.1%)       | 1.11 (CI 0.79-1.55)  | -                    |
|                            | + | 18/191 (9.4%)       | 9/103 (8.7%)        | 9/88 (10.2%)         | 1.19 (CI 0.45-3.14)  | -                    |
| OR                         |   | 0.89 (CI 0.54-1.49) | 0.85 (CI 0.42-1.71) | 0.91 (CI 0.43-1.92)  |                      |                      |
| II. SGA (n=200<br>(9.8%))  |   | Total               | 153/1465 (10.4%)    | 47/575(8.2%)         | 0.76 (CI 0.54-1.08)  | 0.78 (CI 0.54-1.12)  |
| Hypertension               | - | 153/1681 (9.1%)     | 118/1216 (9.7%)     | 35/465 (7.5%)        | 0.76 (CI 0.51-1.12)  | 0.73 (CI 0.48-1.11)  |
|                            | + | 47/358 (13.1%)      | 35/249 (14.1%)      | 12/109 (11.0%)       | 0.76 (CI 0.38-1.52)  | 1.02 (CI 0.47-2.22)  |
| OR                         |   | 1.51 (CI 1.07-2.14) | 1.52 (CI 1.02-2.28) | 1.52 (CI 0.76-3.04)  |                      |                      |
| aOR                        |   | 1.59 (CI 1.09-2.31) | 1.54 (CI 1.00-2.39) | 1.78 (CI 0.82-3.88)  |                      |                      |
|                            |   |                     |                     |                      |                      |                      |
| Obesity                    | - | 149/1415 (10.5%)    | 116/1103 (10.5%)    | 33/312 (10.6%)       | 1.01 (CI 0.67-1.52)  | 1.00 (CI 0.65-1.54)  |
|                            | + | 51/618 (8.3%)       | 37/358 (10.3%)      | 14/260 (5.4%)        | 0.49 (CI 0.26-0.93)  | 0.48 (CI 0.25-0.94)  |
| OR                         |   | 0.76 (CI 0.55-1.07) | 0.98 (CI 0.66-1.45) | 0.48 (CI 0.25-0.92)  |                      |                      |
| aOR                        |   | 0.81 (CI 0.57-1.15) | 1.06 (CI 0.70-1.59) | 0.52 (CI 0.26-1.07)  |                      |                      |
|                            |   |                     |                     |                      |                      |                      |
| Dyslipidemia               | - | 192/1922 (10.0%)    | 149/1397 (10.7%)    | 43/525 (8.2%)        | 0.75 (CI 0.52-1.07)  | 0.74 (CI 0.51-1.08)  |
|                            | + | 8/117 (6.8%)        | 4/67 (6.0%)         | 4/50 (8.0%)          | 1.37 (CI 0.33-5.76)  | 2.55 (CI 0.51-12.80) |
| OR                         |   | 0.66 (CI 0.32-1.38) | 0.53 (CI 0.19-1.48) | 0.98 (CI 0.34-2.84)  |                      |                      |
| aOR                        |   | 0.71 (CI 0.34-1.50) | 0.58 (CI 0.21-1.63) | 0.95 (CI 0.30-2.99)  |                      |                      |
|                            |   |                     |                     |                      |                      |                      |
| Proteinuria                | - | 191/1967 (9.7%)     | 150/1419 (10.6%)    | 41/548 (7.5%)        | 0.68 (CI 0.48-0.98)  | 0.72 (CI 0.49-1.04)  |
|                            | + | 6/26 (23.1%)        | 2/15 (13.3%)        | 4/11 (36.4%)         | 3.71 (CI 0.54-25.59) | NA                   |
| OR                         |   | 2.79 (CI 1.11-7.03) | 1.30 (CI 0.29-5.82) | 7.07 (CI 1.99-25.14) |                      |                      |
| aOR                        |   | 1.84 (CI 0.60-5.70) | NA                  | 9.96 (CI 1.98-50.01) |                      |                      |
|                            |   |                     |                     |                      |                      |                      |
| ≥ 2 constituents           | - | 178/1793 (9.9%)     | 140/1326 (10.6%)    | 38/467 (8.1%)        | 0.75 (CI 0.52-1.09)  | -                    |
|                            | + | 19/191 (9.9%)       | 12/103 (11.7%)      | 7/88 (8.0%)          | 0.65 (CI 0.25-1.74)  | -                    |
| OR                         |   | 1.00 (CI 0.61-1.65) | 1.12 (CI 0.60-2.09) | 0.98 (CI 0.42-2.26)  |                      |                      |

**Table S1.** Odds ratios for LGA and SGA. In vertical direction, ORs are calculated to explore the effect of the constituents for the group as a whole and sub-grouped without and with GDM. Along the horizontal axis, ORs are also detailed to explore an effect of GDM. Adjustments were made for the other constituents of the metabolic syndrome, age, Northern European ethnicity and gestational age at time of OGTT.
