# Supplementary figures and images for: Second-Trimester Constituents of the Metabolic Syndrome and Pregnancy Outcome: An Observational Cohort Study
Source: MDPI journal article supplement (doi:10.3390/nu14142933), 2022-07-18

Supplemental Figure S1

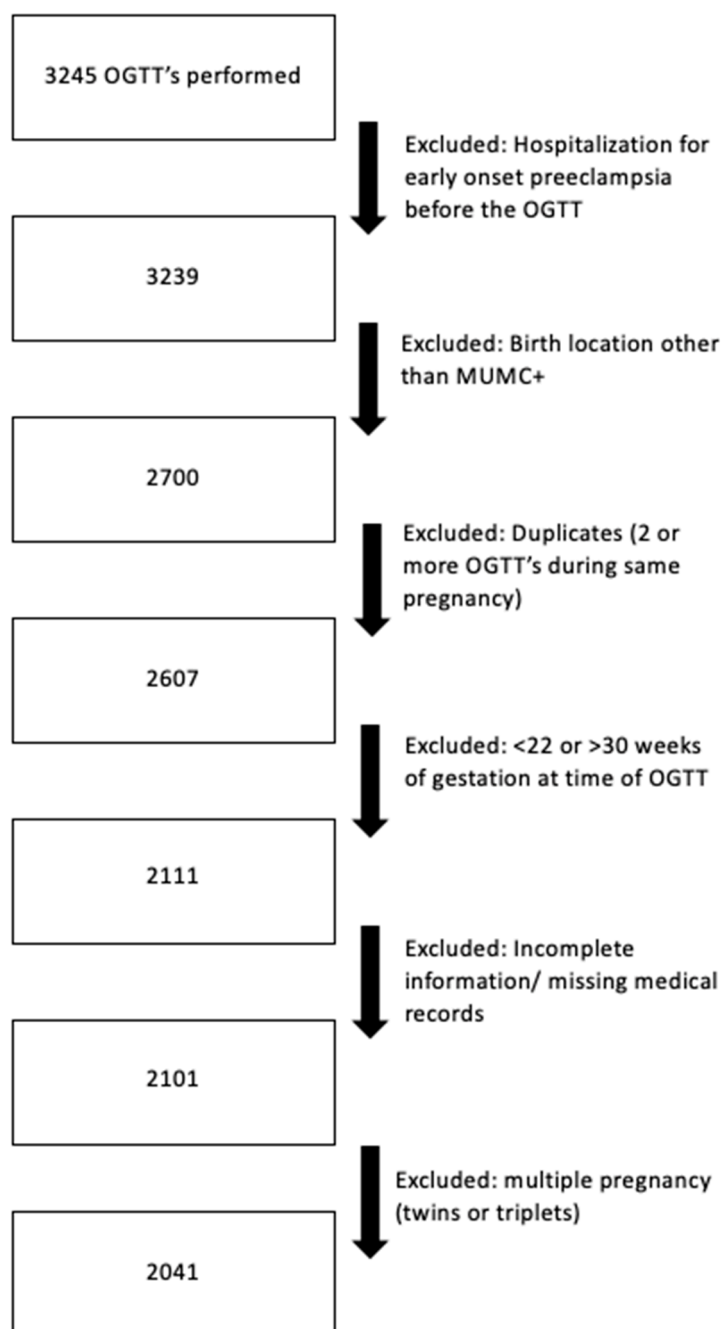

Supplemental Figure S1. *Exclusion procedure*

Supplement: s1 [file s1]
